# Supplementary material
Source: Springer Nature journal article supplement (https://www.springermedizin.de/resource/supplementary/12985_2010_1025_MOESM5_ESM.pdf/9608974)

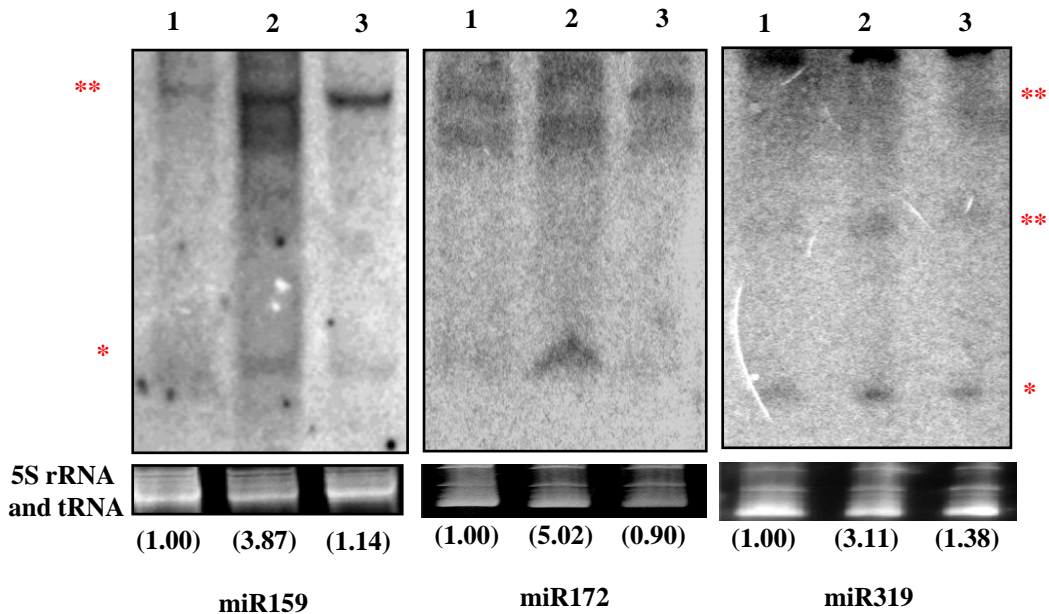

\*\* miRNA-precursors  
\* mature miRNA

Supplement: MOESM5 [file 9608974]
